# Supplementary material for: C3a Receptor Signaling Inhibits Neurodegeneration Induced by Neonatal Hypoxic-Ischemic Brain Injury
Source: PubMed Central journal article supplement (PMC8718687; doi:10.3389/fimmu.2021.768198), 2021-12-17
Supplement: DataSheet_1.pdf [file DataSheet_1.pdf]

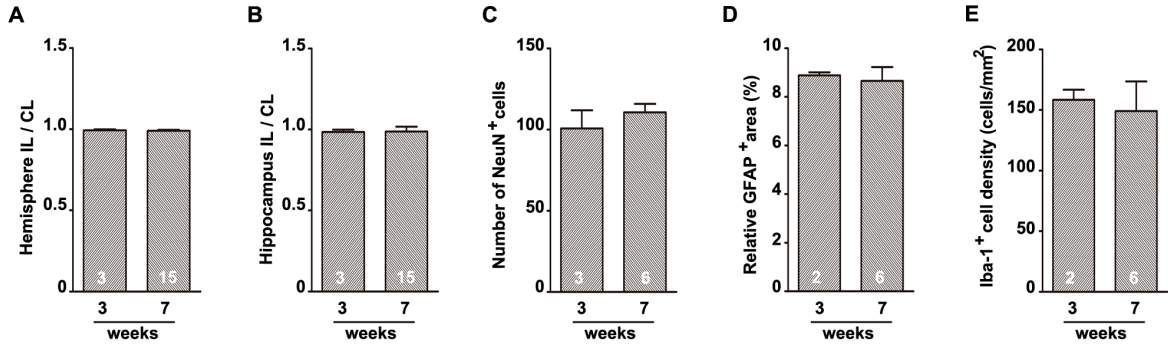

**Supplementary Figure 1. Brain histomorphology does not differ at 3 and 7 weeks after sham surgery.** (A and B) Relative size of the left (ipsilesional, IL) hemisphere (A) and hippocampus (B), (C) number of NeuN<sup>+</sup> cells, (D) relative GFAP<sup>+</sup> area, and (E) density of Iba-1<sup>+</sup> cells in the left CA3 of mice 3 and 7 weeks after sham surgery. CL, contralesional. Data were analyzed by two-tailed unpaired *t* test. Numbers in the bars are numbers of mice. Values are mean ± SEM.

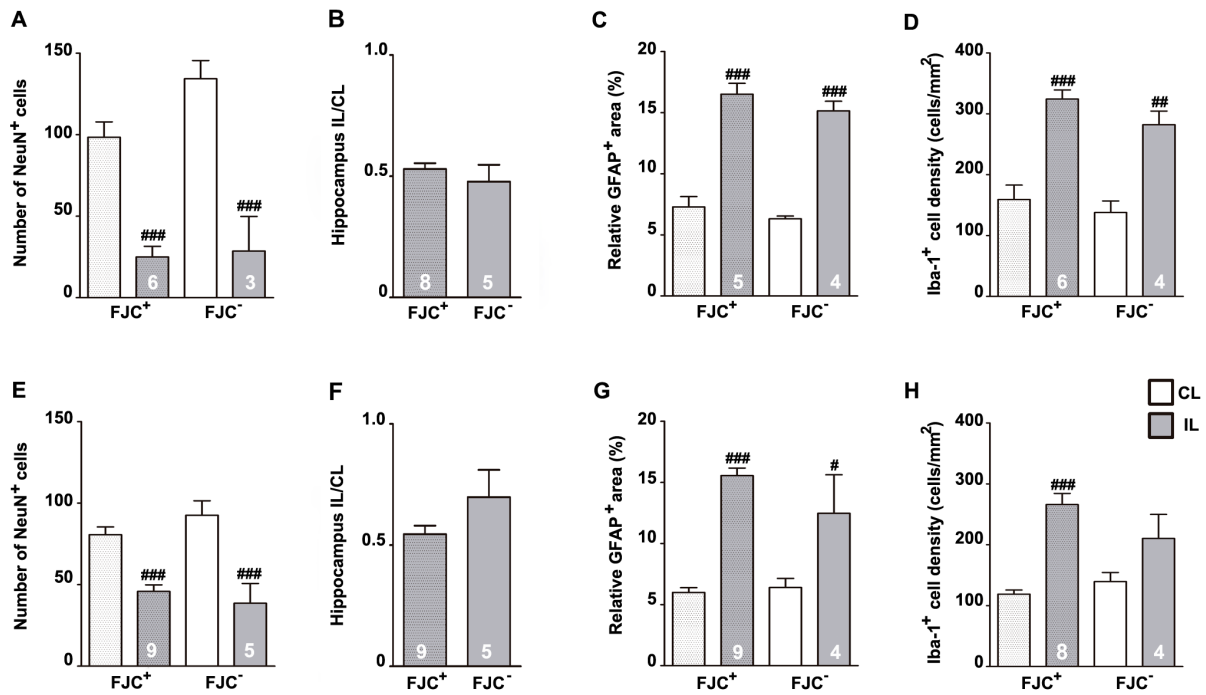

**Supplementary Figure 2. Mice with and without FJC<sup>+</sup> cells in CA3 do not differ in brain histomorphology after HI.** (A) Number of NeuN<sup>+</sup> cells, (B) relative size of the ipsilesional hippocampus, (C) relative GFAP<sup>+</sup> area, and (D) the density of Iba-1<sup>+</sup> cells in CA3 of mice 3 weeks after HI induction. (E) Number of NeuN<sup>+</sup> cells, (F) relative size of the ipsilesional hippocampus, (G) relative GFAP<sup>+</sup> area, and (H) the density of Iba-1<sup>+</sup> cells in CA3 of mice 7 weeks after HI induction. IL, ipsilesional; CL, contralesional. #P < 0.05, ##P < 0.01, ###P < 0.001 vs. contralesional. Data were analyzed by two-tailed unpaired *t* test (A, E) or two-way ANOVA and Tukey's posthoc test (B–D, F–H). Numbers in the bars are numbers of mice. Values are mean ± SEM.

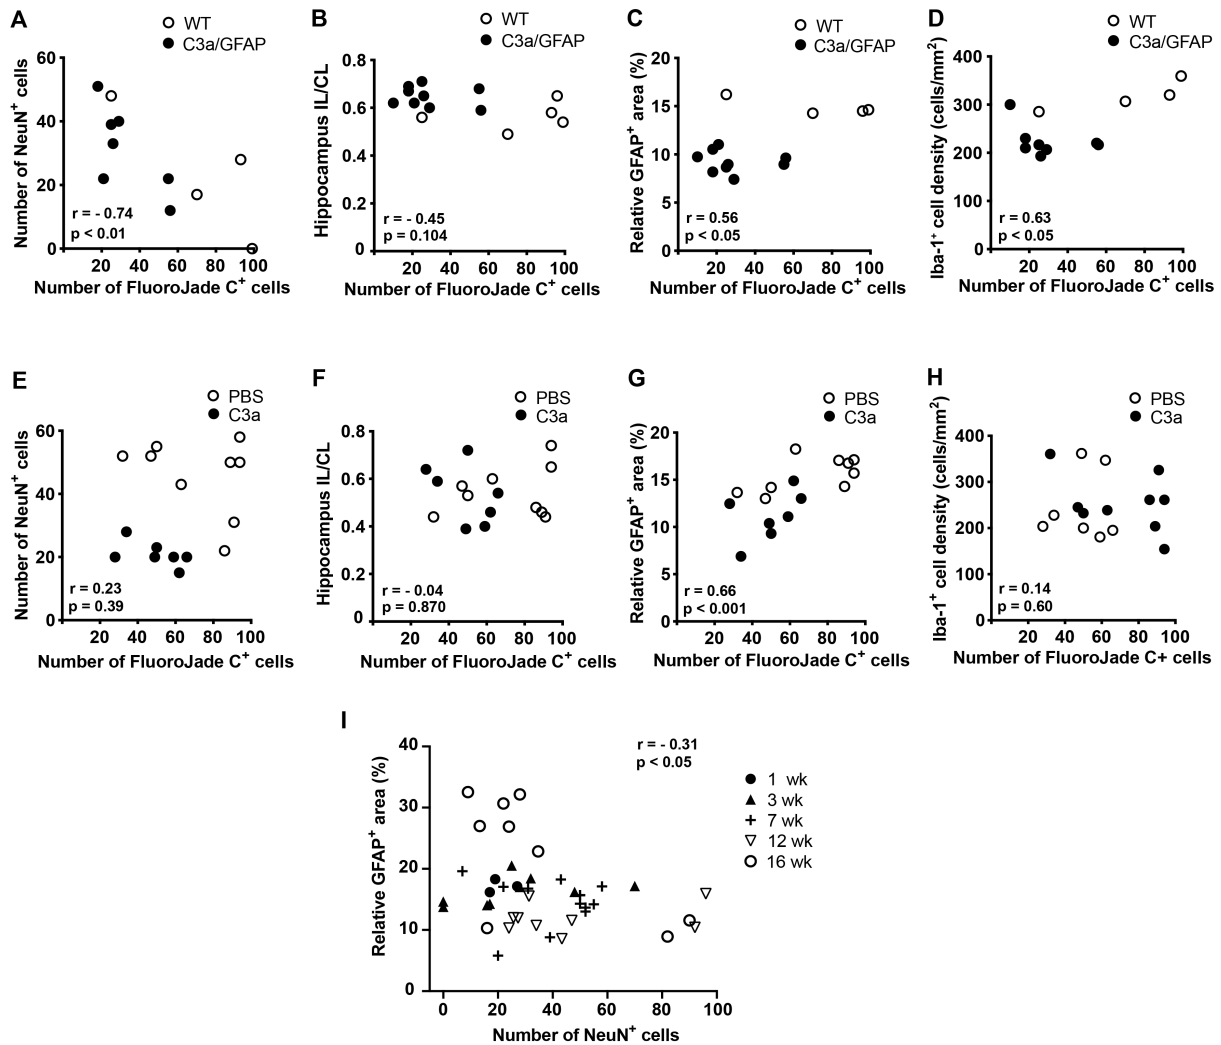

**Supplementary Figure 3. Scatterplots of selected correlations between measures of HI-induced injury, neurodegeneration and reactive gliosis in CA3 after HI.** Correlation between the number of FJC<sup>+</sup> cells and (A) the number of NeuN<sup>+</sup> cells, (B) relative size of ipsilesional hippocampus, (C) relative GFAP<sup>+</sup> area, and (D) the density of Iba-1<sup>+</sup> cells in the CA3 3 weeks after HI, based on data from WT and C3a/GFAP mice as shown in Fig. 3. Correlation between the number of FJC<sup>+</sup> cells and (E) the number of NeuN<sup>+</sup> cells, (F) relative size of ipsilesional hippocampus, (G) relative GFAP<sup>+</sup> area, and (H) the density of Iba-1<sup>+</sup> cells in CA3 at 7 weeks after HI, based on data from WT mice treated with PBS and C3a as shown in Fig. 5. (I) Correlation between the number of NeuN<sup>+</sup> cells and relative GFAP<sup>+</sup> area, based on combined data from all time points after HI induction as shown in Fig. 1C and Fig. 2B. *r*, Pearson's correlation coefficient.
